# Supplementary material
Source: publisher figshare collection journal article supplement (https://asha.figshare.com/ndownloader/files/36056066)
Supplement: Supplementary file 1 [file 36056066]

**Supplemental Material S1.** 1-year neurodevelopmental outcomes after neonatal opioid withdrawal syndrome.

| <b>DAYC-2 subtest</b> | <b><i>M</i> (<i>SD</i>) <i>n</i> = 18</b> |
|-----------------------|-------------------------------------------|
| Cognitive composite   | 102.6 (11.2)                              |
| Language composite    | 100.7 (10.6)                              |
| Receptive language    | 97.3 (12.7)                               |
| Expressive language   | 103.3 (10.1)                              |
| Motor composite       | 100.0 (7.2)                               |
| Fine motor            | 96.1 (5.1)                                |
| Gross motor           | 103.1 (7.6)                               |

*Note.* Scores standardized to population mean of 100 with *SD* of 15 (citation). DAYC-2 = Developmental Assessment of Young Children.
